# Supplementary material for: Global effects of agriculture on fluvial dissolved organic matter
Source: PubMed Central journal article supplement (PMC4635380; doi:10.1038/srep16328), 2015-11-06
Supplement: srep16328-s1.pdf [file srep16328-s1.pdf]

# Global effects of agriculture on fluvial dissolved organic matter

**Daniel Graeber<sup>1,\*</sup>, Iola G. Boëchat<sup>2</sup>, Francisco Encina-Montoya<sup>3</sup>, Carlos Esse<sup>3</sup>, Jörg Gelbrecht<sup>4</sup>, Guillermo Goyenola<sup>5</sup>, Björn Gücker<sup>2</sup>, Marlen Heinz<sup>6</sup>, Brian Kronvang<sup>1</sup>, Mariana Meerhoff<sup>1,5</sup>, Jorge Nimptsch<sup>7</sup>, Martin T. Pusch<sup>6</sup>, Ricky C. S. Silva<sup>8</sup>, Daniel von Schiller<sup>9</sup>, and Elke Zwirnmann<sup>4</sup>**

<sup>1</sup>Department of Bioscience, Aarhus University, Denmark

<sup>2</sup>Department of Geosciences, Federal University of São João del-Rei, Brazil

<sup>3</sup>Faculty of Natural Resources, Environmental Science Nucleus, Catholic University of Temuco, Chile

<sup>4</sup>Department of Chemical Analytics and Biogeochemistry, Leibniz-Institute of Freshwater Ecology and Inland Fisheries, Germany

<sup>5</sup>Department of Theoretical and Applied Ecology, CURE – Faculty of Sciences, Universidad de la República, Uruguay

<sup>6</sup>Department of Ecosystem Research, Leibniz-Institute of Freshwater Ecology and Inland Fisheries, Germany

<sup>7</sup>Institute of Marine and Limnological Sciences, Faculty of Sciences, University Austral de Chile, Chile

<sup>8</sup>Department of Natural Sciences, Federal University of São João del-Rei, Brazil

<sup>9</sup>Department of Plant Biology and Ecology, Faculty of Science and Technology, University of the Basque Country, Spain

\*dgr@bios.au.dk , Second to last author are ordered in alphabetical order.

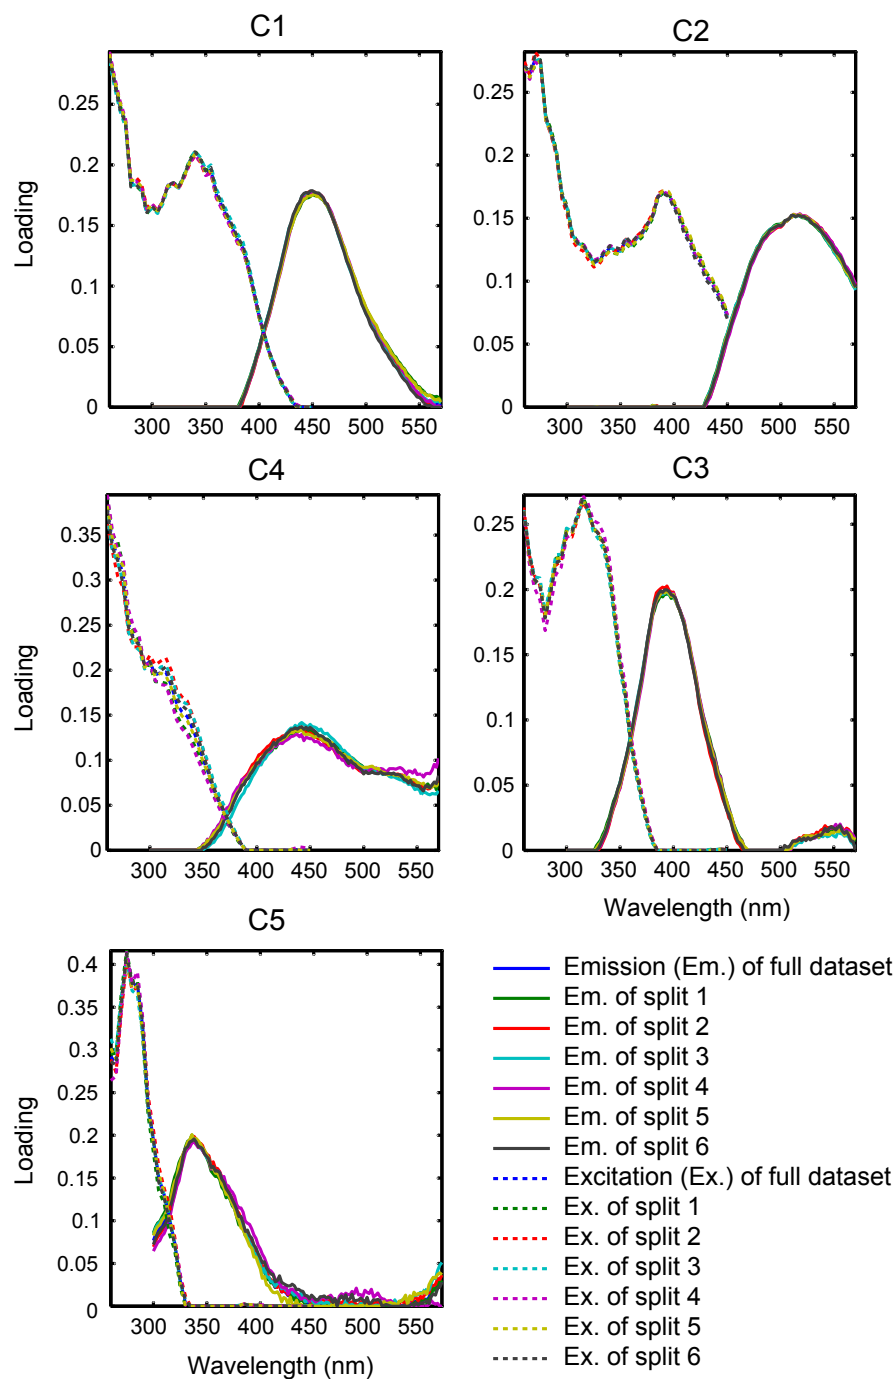

**Supplementary Figure S1 | Split-half validation of the PARAFAC model.** The models for six halves generated by split-half validation are shown. When the fits of the splits are similar to each other and the entire model, a high stability of the model and low randomness of the fluorophores is given.

**Supplementary Table S1 | Maxima of the PARAFAC components (nm).**

| Component | Primary Ex. peak | Secondary Ex. peak | Emission peak |
|-----------|------------------|--------------------|---------------|
| C1        | < 260            | 340                | 450           |
| C2        | 270              | 390                | 518           |
| C3        | 315              | < 260              | 394           |
| C4        | < 260            | —                  | 442           |
| C5        | 275              | —                  | 336           |

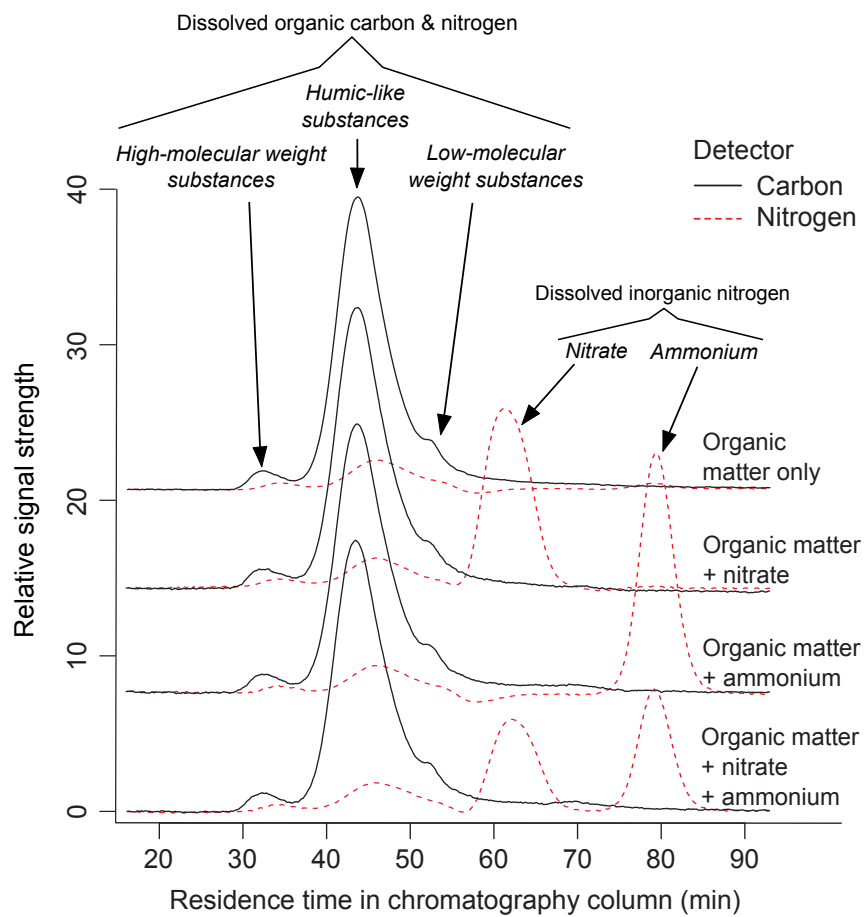

**Supplementary Figure S2 | Typical chromatogram of size-exclusion chromatography.** The chromatogram shows the distribution of DOM fractions with and without added nitrate and ammonium. The sample for this chromatogram was taken at a wetland outflow (part of the German subdataset of this study) .

## Supplementary Catchment Data

The number of sampled catchments ranged between 4 and 19 for each pristine, intensive farming and extensive farming catchments within each season and climate zone (Supplementary Table S2). Excepted from this were tropical catchments, as due to very low DOM concentrations, the DOM composition measurements for some samples exhibited a high uncertainty and thus had to be excluded. Therefore, only two reference catchments could be included for each dry and wet season and only three arable farming catchments could be included for the dry season (Supplementary Table S2). In addition, one stream could only be sampled once due to seasonal stream intermittency (ESP-06). Other streams of the same land use were sampled instead. Moreover, the summer samples for DK-13 and GER-05 and a part of the samples from Chile (7 samples from winter/wet season: CHL-10, CHL-11, CHL-12, CHL-13, CHL-14, CHL-15, CHL-17) and Uruguay (2 samples from wet season: DF-03 and DF-08) were damaged during transport and thus could not be measured. These samples represented only one observation within one of the seasons (Supplementary information Table S2).

Detailed soil and land use characteristics are available for the countries of the northern temperate (Germany, Denmark), Mediterranean (Spain) and southern temperate (Chile) climate zone (Supplementary information Table S3, S4, S5). Here the percentages of agricultural land-use types could be analysed in detail based on the European Corine dataset<sup>1</sup> in Germany and Spain, based on a national mapping in Denmark, and based on Landsat data in Chile and Uruguay. Landsat data was also planned to be used for Brazil, however, the land use classification of the Landsat data were in disagreement with the data from ground-based surveys at the streams. Thus, we used classes based on ground surveys for the land use groupings instead of the Landsat data for Brazil.

## References

- [1] European Environmental Agency. Clc2006 technical guidelines. Tech. Rep., European Environmental Agency (2007).

**Supplementary Table S2 | Site abbreviations, climate zone, country, number of observations, catchment size and GPS coordinates.** Each site was sampled during the two main seasons, but due to different reasons, a part of the sites could only be sampled once (see text above for explanations). Pristine, pristine forest and pristine wetland belong to the reference catchments.

| Site  | Biome              | Country | Type              | Observations | Catchment size  | GPS Y                   | GPS X |
|-------|--------------------|---------|-------------------|--------------|-----------------|-------------------------|-------|
|       |                    |         |                   |              | km <sup>2</sup> | WGS 84, decimal degrees |       |
| DK-01 | Northern temperate | Denmark | intensive farming | 2            | 14.4            | 55.65                   | 8.53  |
| DK-02 | Northern temperate | Denmark | intensive farming | 2            | 9.5             | 55.49                   | 9.2   |
| DK-03 | Northern temperate | Denmark | intensive farming | 2            | 6               | 56                      | 9.85  |
| DK-04 | Northern temperate | Denmark | intensive farming | 2            | 46.4            | 56.11                   | 9.82  |
| DK-05 | Northern temperate | Denmark | intensive farming | 2            | 3.9             | 56.23                   | 9.76  |
| DK-07 | Northern temperate | Denmark | pristine          | 2            | 4.6             | 56.08                   | 9.42  |
| DK-09 | Northern temperate | Denmark | pristine          | 2            | 0.6             | 56.25                   | 10.6  |
| DK-10 | Northern temperate | Denmark | intensive farming | 2            | 11.2            | 56.64                   | 9.04  |
| DK-11 | Northern temperate | Denmark | pristine          | 2            | 5.4             | 56.47                   | 8.38  |
| DK-12 | Northern temperate | Denmark | intensive farming | 2            | 21.9            | 55.84                   | 9.51  |
| DK-13 | Northern temperate | Denmark | pristine          | 1            | 0.4             | 55.11                   | 10.32 |
| DK-14 | Northern temperate | Denmark | pristine          | 2            | 0.6             | 55.09                   | 10.54 |
| DK-15 | Northern temperate | Denmark | intensive farming | 2            | 4.3             | 55.12                   | 10.77 |

Continued on next page

| Site   | Biome              | Country | Type              | Observations | Catchment size<br>km <sup>2</sup> | GPS Y<br>WGS 84, decimal degrees | GPS X<br>decimal degrees |
|--------|--------------------|---------|-------------------|--------------|-----------------------------------|----------------------------------|--------------------------|
| DK-16  | Northern temperate | Denmark | intensive farming | 2            | 5.4                               | 55.8                             | 12.03                    |
| DK-17  | Northern temperate | Denmark | pristine          | 2            | 6.1                               | 55.96                            | 12.35                    |
| DK-18  | Northern temperate | Denmark | pristine          | 2            | 0.6                               | 55.78                            | 12.44                    |
| DK-19  | Northern temperate | Denmark | intensive farming | 2            | 12.9                              | 55.49                            | 11.77                    |
| DK-20  | Northern temperate | Denmark | intensive farming | 2            | 15                                | 55.33                            | 11.6                     |
| DK-21  | Northern temperate | Denmark | pristine          | 2            | 0.5                               | 56.12                            | 9.52                     |
| GER-02 | Northern temperate | Germany | intensive farming | 2            | 4.1                               | 52.18                            | 14.18                    |
| GER-03 | Northern temperate | Germany | intensive farming | 2            | 3.5                               | 52.34                            | 14.35                    |
| GER-04 | Northern temperate | Germany | intensive farming | 2            | 2.1                               | 52.15                            | 14.13                    |
| GER-05 | Northern temperate | Germany | intensive farming | 1            | 3.5                               | 52.17                            | 14.13                    |
| GER-06 | Northern temperate | Germany | intensive farming | 2            | 3.9                               | 52.15                            | 14.11                    |
| GER-07 | Northern temperate | Germany | intensive farming | 2            | 4.3                               | 52.44                            | 14.26                    |
| GER-08 | Northern temperate | Germany | pristine forest   | 2            | 5                                 | 52.26                            | 14.07                    |
| GER-09 | Northern temperate | Germany | intensive farming | 2            | 8.9                               | 52.41                            | 14.21                    |
| GER-10 | Northern temperate | Germany | intensive farming | 2            | 2.5                               | 52.44                            | 14.14                    |
| GER-11 | Northern temperate | Germany | pristine forest   | 2            | 0.1                               | 52.13                            | 14.47                    |

Continued on next page



| Site   | Biome              | Country | Type              | Observations | Catchment size | GPS Y                   | GPS X |
|--------|--------------------|---------|-------------------|--------------|----------------|-------------------------|-------|
|        |                    |         |                   |              | km2            | WGS 84, decimal degrees |       |
| GER-12 | Northern temperate | Germany | pristine forest   | 2            | 1.3            | 52.1                    | 14.49 |
| GER-13 | Northern temperate | Germany | pristine forest   | 2            | 0.3            | 52.11                   | 14.43 |
| GER-14 | Northern temperate | Germany | extensive farming | 2            | 20.2           | 52.76                   | 12.94 |
| GER-15 | Northern temperate | Germany | extensive farming | 2            | 8.7            | 52.78                   | 13.04 |
| GER-17 | Northern temperate | Germany | extensive farming | 2            | 3.5            | 52.29                   | 13.33 |
| GER-18 | Northern temperate | Germany | extensive farming | 2            | 4.4            | 52.29                   | 13.33 |
| GER-20 | Northern temperate | Germany | extensive farming | 2            | 24.3           | 52.78                   | 12.94 |
| GER-21 | Northern temperate | Germany | pristine forest   | 2            | 1.7            | 52.11                   | 14.43 |
| GER-22 | Northern temperate | Germany | pristine wetland  | 2            | 2.4            | 52.35                   | 14.2  |
| GER-23 | Northern temperate | Germany | pristine wetland  | 2            | 6.6            | 52.52                   | 13.84 |
| GER-24 | Northern temperate | Germany | pristine wetland  | 2            | 0.4            | 52.47                   | 13.97 |
| GER-25 | Northern temperate | Germany | pristine wetland  | 2            | 1.2            | 52.47                   | 13.97 |
| GER-26 | Northern temperate | Germany | pristine wetland  | 2            | 0.2            | 52.34                   | 13.8  |
| GER-28 | Northern temperate | Germany | pristine wetland  | 2            | 6.8            | 52.16                   | 13.58 |
| ESP-01 | Mediterranean      | Spain   | pristine          | 2            | 8.1            | 41.71                   | 2.61  |
| ESP-02 | Mediterranean      | Spain   | pristine          | 2            | 13.2           | 41.7                    | 2.58  |

Continued on next page

| Site   | Biome         | Country | Type              | Observations | Catchment size<br>km <sup>2</sup> | GPS Y  | GPS X  |
|--------|---------------|---------|-------------------|--------------|-----------------------------------|--------|--------|
| ESP-03 | Mediterranean | Spain   | pristine          | 2            | 1.4                               | 41.71  | 2.56   |
| ESP-04 | Mediterranean | Spain   | pristine          | 2            | 4.7                               | 41.71  | 2.56   |
| ESP-05 | Mediterranean | Spain   | pristine          | 2            | 0.7                               | 41.66  | 2.53   |
| ESP-06 | Mediterranean | Spain   | intensive farming | 1            | 1.4                               | 42.08  | 2.83   |
| ESP-07 | Mediterranean | Spain   | intensive farming | 2            | 1.1                               | 42.09  | 2.84   |
| ESP-08 | Mediterranean | Spain   | pristine          | 2            | 11.5                              | 42.22  | 2.8    |
| ESP-09 | Mediterranean | Spain   | intensive farming | 2            | 0.8                               | 42.24  | 2.86   |
| ESP-10 | Mediterranean | Spain   | intensive farming | 2            | 1.2                               | 42.24  | 2.85   |
| ESP-12 | Mediterranean | Spain   | intensive farming | 2            | 1                                 | 42.22  | 3.06   |
| ESP-13 | Mediterranean | Spain   | intensive farming | 2            | 1                                 | 42.22  | 3.06   |
| ESP-14 | Mediterranean | Spain   | pristine          | 2            | 19.1                              | 41.83  | 2.94   |
| BR-01  | Tropical      | Brazil  | pristine          | 2            | 2.8                               | -21.06 | -44.19 |
| BR-02  | Tropical      | Brazil  | pristine          | 1            | 1.4                               | -21.11 | -44.18 |
| BR-04  | Tropical      | Brazil  | pristine          | 1            | 0.1                               | -21.04 | -44.15 |
| BR-11  | Tropical      | Brazil  | intensive farming | 1            | 0.2                               | -21.02 | -44.23 |
| BR-12  | Tropical      | Brazil  | intensive farming | 2            | 4.2                               | -21.17 | -44.05 |

Continued on next page

| Site   | Biome              | Country | Type              | Observations | Catchment size | GPS Y                   | GPS X  |
|--------|--------------------|---------|-------------------|--------------|----------------|-------------------------|--------|
|        |                    |         |                   |              | km2            | WGS 84, decimal degrees |        |
| BR-13  | Tropical           | Brazil  | intensive farming | 1            | 1.5            | -21.04                  | -44.22 |
| BR-14  | Tropical           | Brazil  | intensive farming | 2            | 4.2            | -21.1                   | -44.2  |
| BR-15  | Tropical           | Brazil  | intensive farming | 2            | 1.5            | -20.99                  | -44.19 |
| BR-16  | Tropical           | Brazil  | extensive farming | 2            | 2.1            | -20.94                  | -44.06 |
| BR-17  | Tropical           | Brazil  | extensive farming | 1            | 1.1            | -21.06                  | -44.17 |
| BR-18  | Tropical           | Brazil  | extensive farming | 1            | 1.4            | -21                     | -44.19 |
| BR-19  | Tropical           | Brazil  | extensive farming | 2            | 1.9            | -21.02                  | -44.18 |
| BR-20  | Tropical           | Brazil  | extensive farming | 2            | 0.2            | -21.05                  | -44.08 |
| BR-21  | Tropical           | Brazil  | intensive farming | 1            | 0.7            | -21.07                  | -44.16 |
| BR-22  | Tropical           | Brazil  | extensive farming | 1            | 0.5            | -21.12                  | -44.2  |
| CHL-02 | Southern temperate | Chile   | pristine          | 1            | 13.14          | -38.55                  | -72.57 |
| CHL-03 | Southern temperate | Chile   | extensive farming | 2            | 28.51          | -40.53                  | -72.59 |
| CHL-04 | Southern temperate | Chile   | pristine          | 1            | 17.58          | -40.28                  | -73.29 |
| CHL-05 | Southern temperate | Chile   | pristine          | 2            | 13.61          | -40.2                   | -73.42 |
| CHL-06 | Southern temperate | Chile   | pristine          | 1            | 24.85          | -40.23                  | -73.59 |
| CHL-07 | Southern temperate | Chile   | pristine          | 2            | 9.05           | -40.09                  | -73.37 |

Continued on next page

| Site   | Biome              | Country | Type              | Observations | Catchment size | GPS Y                   | GPS X  |
|--------|--------------------|---------|-------------------|--------------|----------------|-------------------------|--------|
|        |                    |         |                   |              | km2            | WGS 84, decimal degrees |        |
| CHL-08 | Southern temperate | Chile   | pristine          | 2            | 24.89          | -40.03                  | -73.03 |
| CHL-09 | Southern temperate | Chile   | pristine          | 2            | 13.15          | -39.33                  | -73.19 |
| CHL-10 | Southern temperate | Chile   | extensive farming | 1            | 34.37          | -38.99                  | -73.21 |
| CHL-11 | Southern temperate | Chile   | extensive farming | 1            | 26.63          | -38.96                  | -73.09 |
| CHL-12 | Southern temperate | Chile   | extensive farming | 1            | 34.27          | -38.85                  | -73.04 |
| CHL-13 | Southern temperate | Chile   | extensive farming | 1            | 37.13          | -39.15                  | -72.41 |
| CHL-14 | Southern temperate | Chile   | extensive farming | 1            | 38.78          | -39.27                  | -72.47 |
| CHL-15 | Southern temperate | Chile   | pristine          | 1            | 24.29          | -39.41                  | -72.56 |
| CHL-16 | Southern temperate | Chile   | extensive farming | 2            | 27.26          | -39.02                  | -72.46 |
| CHL-17 | Southern temperate | Chile   | extensive farming | 1            | 37.95          | -40.34                  | -72.64 |
| CHL-18 | Southern temperate | Chile   | extensive farming | 2            | 26.62          | -40.23                  | -72.61 |
| A01    | Subtropical        | Uruguay | intensive farming | 2            | 9.23           | -34.16                  | -56.68 |
| A12    | Subtropical        | Uruguay | intensive farming | 2            | 12.31          | -32.22                  | -54.43 |
| A22    | Subtropical        | Uruguay | intensive farming | 2            | 5.33           | -34.06                  | -58.09 |
| A23    | Subtropical        | Uruguay | intensive farming | 2            | 4.32           | -34.06                  | -58.06 |
| A37    | Subtropical        | Uruguay | intensive farming | 2            | 9.1            | -33.48                  | -57.86 |

Continued on next page

| Site | Biome       | Country | Type              | Observations | Catchment size | GPS Y                   | GPS X  |
|------|-------------|---------|-------------------|--------------|----------------|-------------------------|--------|
|      |             |         |                   |              | km2            | WGS 84, decimal degrees |        |
| A39  | Subtropical | Uruguay | intensive farming | 2            | 10.12          | -33.16                  | -57.62 |
| A58  | Subtropical | Uruguay | intensive farming | 2            | 9.39           | -33.17                  | -58.12 |
| A59  | Subtropical | Uruguay | intensive farming | 2            | 10.64          | -33.17                  | -58.25 |
| A60  | Subtropical | Uruguay | intensive farming | 2            | 7.69           | -33.21                  | -58.31 |
| A61  | Subtropical | Uruguay | intensive farming | 2            | 10             | -33.15                  | -58.27 |
| A63  | Subtropical | Uruguay | intensive farming | 2            | 21.7           | -33.03                  | -57.95 |
| A65  | Subtropical | Uruguay | intensive farming | 2            | 9.53           | -33                     | -58.03 |
| DF01 | Subtropical | Uruguay | extensive farming | 2            | 30.44          | -34.06                  | -56.62 |
| DF02 | Subtropical | Uruguay | extensive farming | 2            | 6.48           | -34.13                  | -56.65 |
| DF03 | Subtropical | Uruguay | extensive farming | 1            | 8.71           | -34.15                  | -56.7  |
| DF06 | Subtropical | Uruguay | extensive farming | 2            | 16.16          | -33.22                  | -57.97 |
| DF07 | Subtropical | Uruguay | extensive farming | 2            | 5.63           | -32.81                  | -57.4  |
| DF08 | Subtropical | Uruguay | extensive farming | 1            | 8.72           | -32.86                  | -57.39 |
| DF09 | Subtropical | Uruguay | extensive farming | 2            | 5.44           | -32.8                   | -57.39 |
| DF10 | Subtropical | Uruguay | extensive farming | 2            | 5.56           | -32.79                  | -57.38 |
| DF11 | Subtropical | Uruguay | extensive farming | 2            | 17.2           | -34.18                  | -57.83 |

Continued on next page

| Site | Biome       | Country | Type     | Observations | Catchment size  | GPS Y                   | GPS X  |
|------|-------------|---------|----------|--------------|-----------------|-------------------------|--------|
|      |             |         |          |              | km <sup>2</sup> | WGS 84, decimal degrees |        |
| E02  | Subtropical | Uruguay | pristine | 2            | 12.72           | -33.98                  | -56.48 |
| E05  | Subtropical | Uruguay | pristine | 2            | 20.93           | -32.65                  | -56.54 |
| E07  | Subtropical | Uruguay | pristine | 2            | 17.51           | -32.33                  | -56.25 |
| E08  | Subtropical | Uruguay | pristine | 2            | 3.06            | -32.17                  | -56.11 |
| E09  | Subtropical | Uruguay | pristine | 2            | 5.33            | -32.21                  | -56.08 |
| E30  | Subtropical | Uruguay | pristine | 2            | 6.31            | -32.53                  | -56.63 |
| E26  | Subtropical | Uruguay | pristine | 2            | 17.82           | -32.57                  | -54.41 |
| EFM  | Subtropical | Uruguay | pristine | 2            | 28.54           | -31.79                  | -55.65 |

**Supplementary Table S3 | Site abbreviations and land use in the catchments.**

| Site   | Intensive farming | Extensive farming | Pristine | Other |
|--------|-------------------|-------------------|----------|-------|
| %      |                   |                   |          |       |
| DK-01  | 85.5              | 0.5               | 8.2      | 5.8   |
| DK-02  | 92.7              | 0                 | 0.5      | 6.8   |
| DK-03  | 75.6              | 0.1               | 17.6     | 6.7   |
| DK-04  | 86.9              | 0.3               | 4.4      | 8.5   |
| DK-05  | 93.3              | 0                 | 2.8      | 3.9   |
| DK-07  | 26.1              | 0.2               | 70.5     | 3.2   |
| DK-09  | 0                 | 0                 | 98.2     | 1.8   |
| DK-10  | 88                | 0                 | 0.4      | 11.6  |
| DK-11  | 1.7               | 0                 | 93.9     | 4.5   |
| DK-12  | 88.4              | 0.3               | 3.7      | 7.5   |
| DK-13  | 0                 | 0                 | 98.8     | 1.2   |
| DK-14  | 6.7               | 0                 | 90.1     | 3.2   |
| DK-15  | 88.2              | 0                 | 1.2      | 10.5  |
| DK-16  | 88.1              | 0                 | 3.5      | 8.4   |
| DK-17  | 10.4              | 0                 | 81       | 8.6   |
| DK-18  | 5.5               | 0                 | 89.8     | 4.7   |
| DK-19  | 75.1              | 0.3               | 15.7     | 8.9   |
| DK-20  | 74.5              | 0.1               | 11.6     | 13.9  |
| DK-21  | 0.2               | 0                 | 98       | 1.8   |
| GER-02 | 88.5              | 0                 | 0.5      | 11    |
| GER-03 | 99.7              | 0                 | 0        | 0.3   |
| GER-04 | 99.7              | 0.3               | 0        | 0     |
| GER-05 | 100               | 0                 | 0        | 0     |
| GER-06 | 100               | 0                 | 0        | 0     |

Continued on next page

| Site   | Intensive farming | Extensive farming | Pristine | Other |
|--------|-------------------|-------------------|----------|-------|
| %      |                   |                   |          |       |
| GER-07 | 100               | 0                 | 0        | 0     |
| GER-08 | 29                | 0                 | 71       | 0     |
| GER-09 | 83.1              | 5.8               | 9.6      | 1.5   |
| GER-10 | 97.8              | 0                 | 0        | 2.2   |
| GER-11 | 0                 | 0                 | 95.1     | 4.9   |
| GER-12 | 27.7              | 0                 | 72.3     | 0     |
| GER-13 | 0                 | 0                 | 100      | 0     |
| GER-14 | 15.2              | 71.9              | 8.3      | 4.5   |
| GER-15 | 8.6               | 59.8              | 27.9     | 3.7   |
| GER-17 | 17.7              | 76.9              | 2        | 3.4   |
| GER-18 | 0.4               | 99.2              | 0.4      | 0     |
| GER-20 | 0                 | 78.5              | 21.5     | 0     |
| GER-21 | 0                 | 0                 | 100      | 0     |
| GER-22 | 0                 | 0                 | 100      | 0     |
| GER-23 | 3.7               | 23.6              | 69       | 3.7   |
| GER-24 | 0                 | 0                 | 86.8     | 13.2  |
| GER-25 | 0                 | 0                 | 100      | 0     |
| GER-26 | 0                 | 0                 | 100      | 0     |
| GER-28 | 3.5               | 3.8               | 64.4     | 28.3  |
| ESP-01 | 0.5               | 0                 | 92.8     | 6.7   |
| ESP-02 | 2.3               | 0                 | 97.3     | 0.3   |
| ESP-03 | 0                 | 0                 | 100      | 0     |
| ESP-04 | 0.2               | 0.7               | 98.6     | 0.5   |
| ESP-05 | 1.4               | 0                 | 93.9     | 4.7   |
| ESP-06 | 77.7              | 0                 | 15.5     | 6.8   |

Continued on next page



| Site   | Intensive farming | Extensive farming | Pristine | Other |
|--------|-------------------|-------------------|----------|-------|
|        | %                 |                   |          |       |
| ESP-07 | 86.9              | 0                 | 13.1     | 0     |
| ESP-08 | 13.4              | 0                 | 86.6     | 0     |
| ESP-09 | 96.7              | 0                 | 3.3      | 0     |
| ESP-10 | 88.1              | 0                 | 0        | 11.9  |
| ESP-12 | 95                | 0                 | 0        | 5     |
| ESP-13 | 95                | 0                 | 0        | 5     |
| ESP-14 | 4.9               | 0                 | 91.6     | 3.5   |
| BR-01  | 0                 | 0                 | > 80%    | 0     |
| BR-02  | 0                 | 0                 | > 80%    | 0     |
| BR-04  | 0                 | 0                 | > 80%    | 0     |
| BR-11  | > 50%             | 0                 | 0        | 0     |
| BR-12  | > 50%             | 0                 | 0        | 0     |
| BR-13  | > 50%             | 0                 | 0        | 0     |
| BR-14  | > 50%             | 0                 | 0        | 0     |
| BR-15  | > 50%             | 0                 | 0        | 0     |
| BR-16  | 0                 | > 50%             | 0        | 0     |
| BR-17  | 0                 | > 50%             | 0        | 0     |
| BR-18  | 0                 | > 50%             | 0        | 0     |
| BR-19  | 0                 | > 50%             | 0        | 0     |
| BR-20  | 0                 | > 50%             | 0        | 0     |
| BR-21  | > 50%             | 0                 | 0        | 0     |
| BR-22  | 0                 | > 50%             | 0        | 0     |
| CHL-02 | 2                 | 31.6              | 66.1     | 0.4   |
| CHL-03 | 3                 | 86                | 10.6     | 0.4   |
| CHL-04 | 0                 | 2.9               | 97.1     | 0     |

Continued on next page

| Site   | Intensive farming | Extensive farming | Pristine | Other |
|--------|-------------------|-------------------|----------|-------|
| %      |                   |                   |          |       |
| CHL-05 | 0                 | 0                 | 100      | 0     |
| CHL-06 | 0                 | 0                 | 100      | 0     |
| CHL-07 | 0                 | 30.7              | 69.3     | 0     |
| CHL-08 | 1.2               | 5.3               | 93.5     | 0     |
| CHL-09 | 0                 | 13.4              | 86.6     | 0     |
| CHL-10 | 3.4               | 73.2              | 23.4     | 0     |
| CHL-11 | 4.1               | 50.1              | 45.3     | 0.5   |
| CHL-12 | 0.5               | 69.3              | 30.2     | 0     |
| CHL-13 | 0.2               | 94.4              | 5.4      | 0     |
| CHL-14 | 0                 | 88                | 12       | 0     |
| CHL-15 | 5.6               | 2.1               | 92.3     | 0     |
| CHL-16 | 5.7               | 78.9              | 15       | 0.4   |
| CHL-17 | 1.9               | 90                | 7.5      | 0.6   |
| CHL-18 | 1.7               | 73.4              | 24.7     | 0.2   |
| A01    | 100               | 0                 | 0        | 0     |
| A12    | 99.4              | 0                 | 0        | 0.6   |
| A22    | 91.1              | 0                 | 8.3      | 0.6   |
| A23    | 100               | 0                 | 0        | 0     |
| A37    | 74.7              | 0                 | 24.9     | 0.3   |
| A39    | 89.7              | 0                 | 10.3     | 0.1   |
| A58    | >90               | 0                 | ≤10      | 0     |
| A59    | 93.6              | 0                 | 1.3      | 5     |
| A60    | 89.9              | 0                 | 8.6      | 1.5   |
| A61    | 88.8              | 0                 | 8.7      | 2.6   |
| A63    | >90               | 0                 | ≤10      | 0     |

Continued on next page

| Site | Intensive farming | Extensive farming | Pristine | Other |
|------|-------------------|-------------------|----------|-------|
| %    |                   |                   |          |       |
| A65  | >90               | 0                 | 10       | 0     |
| DF01 | 0                 | 98.6              | 0        | 1.4   |
| DF02 | 0                 | 100               | 0        | 0     |
| DF03 | 0                 | 99.7              | 0        | 0.3   |
| DF06 | 0                 | 99.4              | 0        | 0.6   |
| DF07 | 0                 | 98.8              | 0        | 1.2   |
| DF08 | 0                 | 99.7              | 0        | 0.3   |
| DF09 | 0                 | 98.8              | 0        | 1.2   |
| DF10 | 0                 | 99.9              | 0        | 0.1   |
| DF11 | 0                 | 97.8              | 1.2      | 1     |
| E02  | 22.1              | 0                 | 72.9     | 5     |
| E05  | 0                 | 0                 | 99.4     | 0.6   |
| E07  | 24.6              | 0                 | 74.7     | 0.7   |
| E08  | 0                 | 0                 | 100      | 0     |
| E09  | 10.7              | 0                 | 88.7     | 0.6   |
| E30  | 8                 | 0                 | 91.9     | 0.2   |
| E26  | 21.3              | 0                 | 97.9     | -19.1 |
| EFM  | 3.7               | 0                 | 90.6     | 5.7   |

**Supplementary Table S4 | Site abbreviations and first part of soil types (Albeluvisols – Histosols) in the catchments. Please see Table S5 for first part.**

| Site  | Albeluvisols | Andosols | Arenosols | Cambisols | Ferralsols | Fluvisols | Gleysols | Histosols |
|-------|--------------|----------|-----------|-----------|------------|-----------|----------|-----------|
| DK-01 | 0            | 0        | 0         | 0         | 0          | 0         | 0        | 0         |
| DK-02 | 63.2         | 0        | 0         | 0         | 0          | 0         | 0        | 0         |
| DK-03 | 0            | 0        | 0         | 0         | 0          | 0         | 0        | 0         |
| DK-04 | 0            | 0        | 0         | 0         | 0          | 0         | 0        | 0         |
| DK-05 | 0            | 0        | 0         | 0         | 0          | 0         | 0        | 0         |
| DK-07 | 0            | 0        | 0         | 0         | 0          | 0         | 0        | 0         |
| DK-09 | 0            | 0        | 100       | 0         | 0          | 0         | 0        | 0         |
| DK-10 | 0            | 0        | 0         | 0         | 0          | 0         | 0        | 0         |
| DK-11 | 0            | 0        | 0         | 0         | 0          | 0         | 0        | 0         |
| DK-12 | 0            | 0        | 0         | 0         | 0          | 0         | 0        | 0         |
| DK-13 | 0            | 0        | 0         | 0         | 0          | 0         | 0        | 0         |
| DK-14 | 0            | 0        | 0         | 0         | 0          | 0         | 0        | 0         |
| DK-15 | 0            | 0        | 0         | 0         | 0          | 0         | 0        | 0         |
| DK-16 | 0            | 0        | 0         | 0         | 0          | 0         | 0        | 0         |
| DK-17 | 0            | 0        | 0         | 0         | 0          | 0         | 0        | 0         |

Continued on next page

| Site   | Albeluvisols | Andosols | Arenosols | Cambisols | Ferralsols | Fluvisols | Gleysols | Histosols |
|--------|--------------|----------|-----------|-----------|------------|-----------|----------|-----------|
| DK-18  | 0            | 0        | 0         | 0         | 0          | 0         | 0        | 0         |
| DK-19  | 0            | 0        | 12.8      | 87.2      | 0          | 0         | 0        | 0         |
| DK-20  | 0            | 0        | 0         | 100       | 0          | 0         | 0        | 0         |
| DK-21  | 0            | 0        | 0         | 0         | 0          | 0         | 0        | 0         |
| GER-02 | 56.9         | 0        | 43.1      | 0         | 0          | 0         | 0        | 0         |
| GER-03 | 96.3         | 0        | 3.7       | 0         | 0          | 0         | 0        | 0         |
| GER-04 | 75.7         | 0        | 12        | 0         | 0          | 0         | 11.6     | 0.7       |
| GER-05 | 47.6         | 0        | 52.4      | 0         | 0          | 0         | 0        | 0         |
| GER-06 | 58.5         | 0        | 41.5      | 0         | 0          | 0         | 0        | 0         |
| GER-07 | 94.8         | 0        | 0         | 0         | 0          | 0         | 0        | 5.2       |
| GER-08 | 11.4         | 0        | 88.6      | 0         | 0          | 0         | 0        | 0         |
| GER-09 | 73.7         | 0        | 13.1      | 0         | 0          | 0         | 6.9      | 0         |
| GER-10 | 66.6         | 0        | 33.4      | 0         | 0          | 0         | 0        | 0         |
| GER-11 | 0            | 0        | 100       | 0         | 0          | 0         | 0        | 0         |
| GER-12 | 0            | 0        | 80.2      | 0         | 0          | 0         | 19.8     | 0         |
| GER-13 | 0            | 0        | 100       | 0         | 0          | 0         | 0        | 0         |
| GER-14 | 11.4         | 0        | 12.2      | 0         | 0          | 0         | 17.9     | 58.6      |

Continued on next page

| Site   | Albeluvisols | Andosols | Arenosols | Cambisols | Ferralsols | Fluvisols | Gleysols | Histosols |
|--------|--------------|----------|-----------|-----------|------------|-----------|----------|-----------|
| GER-15 | 0            | 0        | 27        | 0         | 0          | 0         | 9.2      | 63.7      |
| GER-17 | 13           | 0        | 8.1       | 0         | 0          | 0         | 26.6     | 51.9      |
| GER-18 | 0            | 0        | 0.8       | 0         | 0          | 0         | 0        | 99.2      |
| GER-20 | 0            | 0        | 0         | 0         | 0          | 0         | 11.7     | 88.3      |
| GER-21 | 0            | 0        | 99.8      | 0         | 0          | 0         | 0.2      | 0         |
| GER-22 | 0            | 0        | 58.1      | 0         | 0          | 0         | 30.1     | 11.8      |
| GER-23 | 0            | 0        | 74.1      | 0         | 0          | 0         | 0        | 25.9      |
| GER-24 | 0            | 0        | 81.4      | 0         | 0          | 0         | 18.6     | 0         |
| GER-25 | 0            | 0        | 63.2      | 0         | 0          | 0         | 36.8     | 0         |
| GER-26 | 0            | 0        | 71.3      | 0         | 0          | 0         | 0        | 28.7      |
| GER-28 | 0            | 0        | 67.8      | 0         | 0          | 0         | 14.3     | 17.2      |
| ESP-01 | 0            | 0        | 0         | 0         | 0          | 0         | 0        | 0         |
| ESP-02 | 0            | 0        | 0         | 0         | 0          | 1.4       | 0        | 0         |
| ESP-03 | 0            | 0        | 0         | 0         | 0          | 100       | 0        | 0         |
| ESP-04 | 0            | 0        | 0         | 0         | 0          | 66.4      | 0        | 0         |
| ESP-05 | 0            | 0        | 0         | 0         | 0          | 0         | 0        | 0         |
| ESP-06 | 0            | 0        | 0         | 49.2      | 0          | 0         | 0        | 0         |

Continued on next page

| Site   | Albeluvisols | Andosols | Arenosols | Cambisols | Ferralsols | Fluvisols | Gleysols | Histosols |
|--------|--------------|----------|-----------|-----------|------------|-----------|----------|-----------|
| ESP-07 | 0            | 0        | 0         | 100       | 0          | 0         | 0        | 0         |
| ESP-08 | 0            | 0        | 0         | 73.2      | 0          | 0         | 0        | 0         |
| ESP-09 | 0            | 0        | 0         | 100       | 0          | 0         | 0        | 0         |
| ESP-10 | 0            | 0        | 0         | 100       | 0          | 0         | 0        | 0         |
| ESP-12 | 0            | 0        | 0         | 0         | 0          | 100       | 0        | 0         |
| ESP-13 | 0            | 0        | 0         | 0         | 0          | 100       | 0        | 0         |
| ESP-14 | 0            | 0        | 0         | 0         | 0          | 73.6      | 0        | 0         |
| BR-01  | 0            | 0        | 0         | 0         | 100        | 0         | 0        | 0         |
| BR-02  | 0            | 0        | 0         | 0         | 100        | 0         | 0        | 0         |
| BR-04  | 0            | 0        | 0         | 0         | 100        | 0         | 0        | 0         |
| BR-11  | 0            | 0        | 0         | 0         | 100        | 0         | 0        | 0         |
| BR-12  | 0            | 0        | 0         | 100       | 0          | 0         | 0        | 0         |
| BR-13  | 0            | 0        | 0         | 0         | 100        | 0         | 0        | 0         |
| BR-14  | 0            | 0        | 0         | 0         | 100        | 0         | 0        | 0         |
| BR-15  | 0            | 0        | 0         | 0         | 100        | 0         | 0        | 0         |
| BR-16  | 0            | 0        | 0         | 0         | 100        | 0         | 0        | 0         |
| BR-17  | 0            | 0        | 0         | 0         | 100        | 0         | 0        | 0         |

Continued on next page

| Site   | Albeluvisols | Andosols | Arenosols | Cambisols | Ferralsols | Fluvisols | Gleysols | Histosols |
|--------|--------------|----------|-----------|-----------|------------|-----------|----------|-----------|
| BR-18  | 0            | 0        | 0         | 0         | 100        | 0         | 0        | 0         |
| BR-19  | 0            | 0        | 0         | 0         | 100        | 0         | 0        | 0         |
| BR-20  | 0            | 0        | 0         | 0         | 100        | 0         | 0        | 0         |
| BR-21  | 0            | 0        | 0         | 0         | 100        | 0         | 0        | 0         |
| BR-22  | 0            | 0        | 0         | 0         | 100        | 0         | 0        | 0         |
| CHL-02 | 0            | 0        | 0         | 0         | 0          | 0         | 0        | 0         |
| CHL-03 | 0            | 72.2     | 0         | 0         | 0          | 0         | 27.8     | 0         |
| CHL-04 | 0            | 0        | 0         | 80.1      | 0          | 0         | 0        | 0         |
| CHL-05 | 0            | 0        | 0         | 100       | 0          | 0         | 0        | 0         |
| CHL-06 | 0            | 0        | 0         | 100       | 0          | 0         | 0        | 0         |
| CHL-07 | 0            | 0        | 0         | 100       | 0          | 0         | 0        | 0         |
| CHL-08 | 0            | 100      | 0         | 0         | 0          | 0         | 0        | 0         |
| CHL-09 | 0            | 0        | 0         | 100       | 0          | 0         | 0        | 0         |
| CHL-10 | 0            | 0        | 0         | 0         | 0          | 52.2      | 0        | 0         |
| CHL-11 | 0            | 2.2      | 0         | 0         | 0          | 43        | 0        | 0         |
| CHL-12 | 0            | 74.8     | 0         | 0         | 0          | 0.5       | 0        | 0         |
| CHL-13 | 0            | 100      | 0         | 0         | 0          | 0         | 0        | 0         |

Continued on next page



| Site   | Albeluvisols | Andosols | Arenosols | Cambisols | Ferralsols | Fluvisols | Gleysols | Histosols |
|--------|--------------|----------|-----------|-----------|------------|-----------|----------|-----------|
| CHL-14 | 0            | 100      | 0         | 0         | 0          | 0         | 0        | 0         |
| CHL-15 | 0            | 0        | 0         | 100       | 0          | 0         | 0        | 0         |
| CHL-16 | 0            | 100      | 0         | 0         | 0          | 0         | 0        | 0         |
| CHL-17 | 0            | 0        | 0         | 0         | 0          | 0         | 100      | 0         |
| CHL-18 | 0            | 30.7     | 0         | 0         | 0          | 0         | 69.3     | 0         |
| A01    | 0            | 0        | 0         | 0         | 0          | 0         | 0        | 0         |
| A12    | 0            | 0        | 0         | 0         | 0          | 0         | 0        | 0         |
| A22    | 0            | 0        | 0         | 0         | 0          | 0         | 0        | 0         |
| A23    | 0            | 0        | 0         | 0         | 0          | 0         | 0        | 0         |
| A37    | 0            | 0        | 0         | 0         | 0          | 0         | 0        | 0         |
| A39    | 0            | 0        | 0         | 0         | 0          | 0         | 0        | 0         |
| A58    | 0            | 0        | 0         | 0         | 0          | 0         | 0        | 0         |
| A59    | 0            | 0        | 0         | 0         | 0          | 0         | 0        | 0         |
| A60    | 0            | 0        | 0         | 0         | 0          | 0         | 0        | 0         |
| A61    | 0            | 0        | 0         | 0         | 0          | 0         | 0        | 0         |
| A63    | 0            | 0        | 0         | 0         | 0          | 0         | 0        | 0         |
| A65    | 0            | 0        | 0         | 0         | 0          | 0         | 0        | 0         |

Continued on next page

| Site | Albeluvisols | Andosols | Arenosols | Cambisols | Ferralsols | Fluvisols | Gleysols | Histosols |
|------|--------------|----------|-----------|-----------|------------|-----------|----------|-----------|
| DF01 | 0            | 0        | 0         | 0         | 0          | 0         | 0        | 0         |
| DF02 | 0            | 0        | 0         | 0         | 0          | 0         | 0        | 0         |
| DF03 | 0            | 0        | 0         | 0         | 0          | 0         | 0        | 0         |
| DF06 | 0            | 0        | 0         | 0         | 0          | 0         | 0        | 0         |
| DF07 | 0            | 0        | 0         | 0         | 0          | 0         | 0        | 0         |
| DF08 | 0            | 0        | 0         | 0         | 0          | 0         | 0        | 0         |
| DF09 | 0            | 0        | 0         | 0         | 0          | 0         | 0        | 0         |
| DF10 | 0            | 0        | 0         | 0         | 0          | 0         | 0        | 0         |
| DF11 | 0            | 0        | 0         | 0         | 0          | 0         | 0        | 0         |
| E02  | 0            | 0        | 0         | 0         | 0          | 0         | 0        | 0         |
| E05  | 0            | 0        | 0         | 0         | 0          | 0         | 0        | 0         |
| E07  | 0            | 0        | 0         | 0         | 0          | 0         | 0        | 0         |
| E08  | 0            | 0        | 0         | 0         | 0          | 0         | 0        | 0         |
| E09  | 0            | 0        | 0         | 0         | 0          | 0         | 0        | 0         |
| E30  | 0            | 0        | 0         | 0         | 0          | 0         | 0        | 0         |
| E26  | 0            | 0        | 0         | 0         | 0          | 0         | 0        | 0         |
| EFM  | 0            | 0        | 0         | 0         | 0          | 0         | 0        | 0         |

**Supplementary Table S5 | Site abbreviations and second part of soil types (Leptosols – Vertisols) in the catchments. Please see Table S4 for first part.**

| Site  | Leptosols | Luvisols | Nitisols | Phaeozems | Planosols | Podzols | Regosols | Vertisols |
|-------|-----------|----------|----------|-----------|-----------|---------|----------|-----------|
| DK-01 | 0         | 0        | 0        | 0         | 0         | 100     | 0        | 0         |
| DK-02 | 0         | 0        | 0        | 0         | 0         | 36.8    | 0        | 0         |
| DK-03 | 0         | 100      | 0        | 0         | 0         | 0       | 0        | 0         |
| DK-04 | 0         | 61.2     | 0        | 0         | 0         | 38.8    | 0        | 0         |
| DK-05 | 0         | 100      | 0        | 0         | 0         | 0       | 0        | 0         |
| DK-07 | 0         | 0        | 0        | 0         | 0         | 100     | 0        | 0         |
| DK-09 | 0         | 0        | 0        | 0         | 0         | 0       | 0        | 0         |
| DK-10 | 0         | 100      | 0        | 0         | 0         | 0       | 0        | 0         |
| DK-11 | 0         | 0        | 0        | 0         | 0         | 100     | 0        | 0         |
| DK-12 | 0         | 92.1     | 0        | 0         | 0         | 7.9     | 0        | 0         |
| DK-13 | 0         | 100      | 0        | 0         | 0         | 0       | 0        | 0         |
| DK-14 | 0         | 100      | 0        | 0         | 0         | 0       | 0        | 0         |
| DK-15 | 0         | 100      | 0        | 0         | 0         | 0       | 0        | 0         |
| DK-16 | 0         | 7.3      | 0        | 0         | 0         | 92.7    | 0        | 0         |
| DK-17 | 0         | 0        | 0        | 0         | 0         | 100     | 0        | 0         |

Continued on next page

| Site   | Leptosols | Luvisols | Nitisols | Phaeozems | Planosols | Podzols | Regosols | Vertisols |
|--------|-----------|----------|----------|-----------|-----------|---------|----------|-----------|
| DK-18  | 0         | 100      | 0        | 0         | 0         | 0       | 0        | 0         |
| DK-19  | 0         | 0        | 0        | 0         | 0         | 0       | 0        | 0         |
| DK-20  | 0         | 0        | 0        | 0         | 0         | 0       | 0        | 0         |
| DK-21  | 0         | 0        | 0        | 0         | 0         | 100     | 0        | 0         |
| GER-02 | 0         | 0        | 0        | 0         | 0         | 0       | 0        | 0         |
| GER-03 | 0         | 0        | 0        | 0         | 0         | 0       | 0        | 0         |
| GER-04 | 0         | 0        | 0        | 0         | 0         | 0       | 0        | 0         |
| GER-05 | 0         | 0        | 0        | 0         | 0         | 0       | 0        | 0         |
| GER-06 | 0         | 0        | 0        | 0         | 0         | 0       | 0        | 0         |
| GER-07 | 0         | 0        | 0        | 0         | 0         | 0       | 0        | 0         |
| GER-08 | 0         | 0        | 0        | 0         | 0         | 0       | 0        | 0         |
| GER-09 | 0         | 6.3      | 0        | 0         | 0         | 0       | 0        | 0         |
| GER-10 | 0         | 0        | 0        | 0         | 0         | 0       | 0        | 0         |
| GER-11 | 0         | 0        | 0        | 0         | 0         | 0       | 0        | 0         |
| GER-12 | 0         | 0        | 0        | 0         | 0         | 0       | 0        | 0         |
| GER-13 | 0         | 0        | 0        | 0         | 0         | 0       | 0        | 0         |
| GER-14 | 0         | 0        | 0        | 0         | 0         | 0       | 0        | 0         |

Continued on next page

| Site   | Leptosols | Luvissols | Nitisols | Phaeozems | Planosols | Podzols | Regosols | Vertisols |
|--------|-----------|-----------|----------|-----------|-----------|---------|----------|-----------|
| GER-15 | 0         | 0         | 0        | 0         | 0         | 0       | 0        | 0         |
| GER-17 | 0         | 0         | 0        | 0         | 0         | 0       | 0.3      | 0         |
| GER-18 | 0         | 0         | 0        | 0         | 0         | 0       | 0        | 0         |
| GER-20 | 0         | 0         | 0        | 0         | 0         | 0       | 0        | 0         |
| GER-21 | 0         | 0         | 0        | 0         | 0         | 0       | 0        | 0         |
| GER-22 | 0         | 0         | 0        | 0         | 0         | 0       | 0        | 0         |
| GER-23 | 0         | 0         | 0        | 0         | 0         | 0       | 0        | 0         |
| GER-24 | 0         | 0         | 0        | 0         | 0         | 0       | 0        | 0         |
| GER-25 | 0         | 0         | 0        | 0         | 0         | 0       | 0        | 0         |
| GER-26 | 0         | 0         | 0        | 0         | 0         | 0       | 0        | 0         |
| GER-28 | 0         | 0         | 0        | 0         | 0         | 0       | 0.7      | 0         |
| ESP-01 | 0         | 0         | 0        | 0         | 0         | 0       | 100      | 0         |
| ESP-02 | 0         | 0         | 0        | 0         | 0         | 0       | 98.6     | 0         |
| ESP-03 | 0         | 0         | 0        | 0         | 0         | 0       | 0        | 0         |
| ESP-04 | 0         | 0         | 0        | 0         | 0         | 0       | 33.6     | 0         |
| ESP-05 | 0         | 0         | 0        | 0         | 0         | 0       | 100      | 0         |
| ESP-06 | 50.8      | 0         | 0        | 0         | 0         | 0       | 0        | 0         |

Continued on next page

| Site   | Leptosols | Luvissols | Nitisols | Phaeozems | Planosols | Podzols | Regosols | Vertisols |
|--------|-----------|-----------|----------|-----------|-----------|---------|----------|-----------|
| ESP-07 | 0         | 0         | 0        | 0         | 0         | 0       | 0        | 0         |
| ESP-08 | 26.8      | 0         | 0        | 0         | 0         | 0       | 0        | 0         |
| ESP-09 | 0         | 0         | 0        | 0         | 0         | 0       | 0        | 0         |
| ESP-10 | 0         | 0         | 0        | 0         | 0         | 0       | 0        | 0         |
| ESP-12 | 0         | 0         | 0        | 0         | 0         | 0       | 0        | 0         |
| ESP-13 | 0         | 0         | 0        | 0         | 0         | 0       | 0        | 0         |
| ESP-14 | 0         | 4.8       | 0        | 0         | 0         | 0       | 21.6     | 0         |
| BR-01  | 0         | 0         | 0        | 0         | 0         | 0       | 0        | 0         |
| BR-02  | 0         | 0         | 0        | 0         | 0         | 0       | 0        | 0         |
| BR-04  | 0         | 0         | 0        | 0         | 0         | 0       | 0        | 0         |
| BR-11  | 0         | 0         | 0        | 0         | 0         | 0       | 0        | 0         |
| BR-12  | 0         | 0         | 0        | 0         | 0         | 0       | 0        | 0         |
| BR-13  | 0         | 0         | 0        | 0         | 0         | 0       | 0        | 0         |
| BR-14  | 0         | 0         | 0        | 0         | 0         | 0       | 0        | 0         |
| BR-15  | 0         | 0         | 0        | 0         | 0         | 0       | 0        | 0         |
| BR-16  | 0         | 0         | 0        | 0         | 0         | 0       | 0        | 0         |
| BR-17  | 0         | 0         | 0        | 0         | 0         | 0       | 0        | 0         |

Continued on next page

| Site   | Leptosols | Luvissols | Nitisols | Phaeozems | Planosols | Podzols | Regosols | Vertisols |
|--------|-----------|-----------|----------|-----------|-----------|---------|----------|-----------|
| BR-18  | 0         | 0         | 0        | 0         | 0         | 0       | 0        | 0         |
| BR-19  | 0         | 0         | 0        | 0         | 0         | 0       | 0        | 0         |
| BR-20  | 0         | 0         | 0        | 0         | 0         | 0       | 0        | 0         |
| BR-21  | 0         | 0         | 0        | 0         | 0         | 0       | 0        | 0         |
| BR-22  | 0         | 0         | 0        | 0         | 0         | 0       | 0        | 0         |
| CHL-02 | 0         | 0         | 100      | 0         | 0         | 0       | 0        | 0         |
| CHL-03 | 0         | 0         | 0        | 0         | 0         | 0       | 0        | 0         |
| CHL-04 | 0         | 0         | 19.9     | 0         | 0         | 0       | 0        | 0         |
| CHL-05 | 100       | 0         | 0        | 0         | 0         | 0       | 0        | 0         |
| CHL-06 | 100       | 0         | 0        | 0         | 0         | 0       | 0        | 0         |
| CHL-07 | 27.6      | 0         | 0        | 0         | 0         | 72.4    | 0        | 0         |
| CHL-08 | 0         | 0         | 0        | 0         | 0         | 0       | 0        | 0         |
| CHL-09 | 0         | 0         | 0        | 0         | 0         | 0       | 0        | 0         |
| CHL-10 | 0         | 0         | 47.8     | 0         | 0         | 0       | 0        | 0         |
| CHL-11 | 0         | 0         | 54.8     | 0         | 0         | 0       | 0        | 0         |
| CHL-12 | 0         | 0         | 24.7     | 0         | 0         | 0       | 0        | 0         |
| CHL-13 | 0         | 0         | 0        | 0         | 0         | 0       | 0        | 0         |

Continued on next page

| Site   | Leptosols | Luvissols | Nitisols | Phaeozems | Planosols | Podzols | Regosols | Vertisols |
|--------|-----------|-----------|----------|-----------|-----------|---------|----------|-----------|
| CHL-14 | 0         | 0         | 0        | 0         | 0         | 0       | 0        | 0         |
| CHL-15 | 0         | 0         | 0        | 0         | 0         | 0       | 0        | 0         |
| CHL-16 | 0         | 0         | 0        | 0         | 0         | 0       | 0        | 0         |
| CHL-17 | 0         | 0         | 0        | 0         | 0         | 0       | 0        | 0         |
| CHL-18 | 0         | 0         | 0        | 0         | 0         | 0       | 0        | 0         |
| A01    | 0         | 0         | 0        | 100       | 0         | 0       | 0        | 0         |
| A12    | 0         | 0         | 0        | 100       | 0         | 0       | 0        | 0         |
| A22    | 0         | 0         | 0        | 100       | 0         | 0       | 0        | 0         |
| A23    | 0         | 0         | 0        | 100       | 0         | 0       | 0        | 0         |
| A37    | 0         | 0         | 0        | 100       | 0         | 0       | 0        | 0         |
| A39    | 0         | 0         | 0        | 100       | 0         | 0       | 0        | 0         |
| A58    | 0         | 0         | 0        | 100       | 0         | 0       | 0        | 0         |
| A59    | 0         | 0         | 0        | 100       | 0         | 0       | 0        | 0         |
| A60    | 0         | 0         | 0        | 100       | 0         | 0       | 0        | 0         |
| A61    | 0         | 0         | 0        | 100       | 0         | 0       | 0        | 0         |
| A63    | 0         | 0         | 0        | 100       | 0         | 0       | 0        | 0         |
| A65    | 0         | 0         | 0        | 100       | 0         | 0       | 0        | 0         |

Continued on next page



| Site | Leptosols | Luvissols | Nitisols | Phaeozems | Planosols | Podzols | Regosols | Vertisols |
|------|-----------|-----------|----------|-----------|-----------|---------|----------|-----------|
| DF01 | 0         | 0         | 0        | 100       | 0         | 0       | 0        | 0         |
| DF02 | 0         | 0         | 0        | 100       | 0         | 0       | 0        | 0         |
| DF03 | 0         | 0         | 0        | 100       | 0         | 0       | 0        | 0         |
| DF06 | 0         | 0         | 0        | 100       | 0         | 0       | 0        | 0         |
| DF07 | 0         | 0         | 0        | 100       | 0         | 0       | 0        | 0         |
| DF08 | 0         | 0         | 0        | 100       | 0         | 0       | 0        | 0         |
| DF09 | 0         | 0         | 0        | 100       | 0         | 0       | 0        | 0         |
| DF10 | 0         | 0         | 0        | 100       | 0         | 0       | 0        | 0         |
| DF11 | 0         | 0         | 0        | 100       | 0         | 0       | 0        | 0         |
| E02  | 0         | 0         | 0        | 100       | 0         | 0       | 0        | 0         |
| E05  | 0         | 0         | 0        | 0         | 0         | 0       | 0        | 100       |
| E07  | 0         | 0         | 0        | 0         | 0         | 0       | 0        | 100       |
| E08  | 0         | 0         | 0        | 0         | 0         | 0       | 0        | 100       |
| E09  | 0         | 0         | 0        | 0         | 0         | 0       | 0        | 100       |
| E30  | 0         | 0         | 0        | 0         | 0         | 0       | 0        | 100       |
| E26  | 0         | 0         | 0        | 99        | 1         | 0       | 0        | 0         |
| EFM  | 0         | 0         | 0        | 100       | 0         | 0       | 0        | 0         |
